# Supplementary material
Source: PubMed Central journal article supplement (PMC3420198)
Supplement: 1206681109_pnas.201206681SI.pdf [file 1206681109_pnas.201206681SI.pdf]

# Supporting Information

Gracia-Lázaro et al. 10.1073/pnas.1206681109

## SI Materials and Methods

**1.1 Volunteer Recruitment and Treatment.** The experiment was carried out with 1,229 volunteers chosen among last year's high school students (17–18 y old) of 42 different high schools located throughout the geography of the Autonomous Region of Aragón, Spain (capital is Zaragoza, the location of the University of Zaragoza); 34 high schools were in the province of Zaragoza, 5 high schools were in the province Huesca, and 3 high schools were in the province of Teruel. For the recruitment of the students, we contacted the coordinators of a program (Ciencia Viva, "Living Science") of the local government that supports the dissemination of science among public high schools of Aragón. Moreover, we also contacted many of the private schools of Zaragoza City to also offer to them the possibility of taking part in the experiment. In all cases, the experiment was referred to as a social experiment, and no one (including the high school teachers in charge of the coordination) knew in advance what the experiment was about (see below).

After the call for participation, we selected 1,300 volunteers. To satisfy ethical procedures, all personal data about the participants were anonymized and treated as confidential. Moreover, the Ethical Committee of the University of Zaragoza approved all procedures. On the day of the experiment, the aforementioned 1,229 volunteers showed up, with 541 males and 688 females representing 44.02% and 55.98% of the total number of players, respectively. Of the 1,229 students, 625 students played the game on a square lattice (274 males and 351 females to keep the male to female ratio), and 604 students played the game on an heterogeneous network. In the first topology, every player had  $k = 4$  neighbors, whereas in the second topology, the connectivity varied between 2 and 16 using a distribution  $\frac{N(k)}{N} = P(k) = Ak^{-2.7}$ , with  $A = (\sum_k P(k))^{-1}$ .

All of the students played through a web interface specifically created for the experiment (see below) that was accessible through the computers available in the computer rooms of their respective schools. At least one teacher supervised the experiment in each computer room (which at most, had a maximum capacity of 20 students), preventing any interaction among the students. To further guarantee that potential interactions among students seated next to each other in the class do not influence the results of the experiment, the assignment of players to the different topologies was completely random. Hence, the odds of having two participants geographically close (i.e., of the same school and seating next to each other) who were also neighbors in the virtual topology was quite small. In addition, as described below, the colors used to code the two available actions of the game were also selected randomly, also decreasing the likelihood that neighboring participants could influence each other.

We describe the steps followed by each participant during the experiments. In short, all participants went through a tutorial on the screen, including questions to check their understanding of the game. When everyone had gone through the tutorial, the experiment began, lasting for approximately 1 h. At the end of the experiments, volunteers were presented a small questionnaire to fill in. Immediately after, all participants received their earnings and their show-up fee. Total earnings in the experiment ranged from 2.49 to 40.48 Euros.

**1.2 Experimental Platform and Interface.** The experiment was run using a fairly sophisticated web application specifically developed to this purpose. The application was made entirely using free software. It was developed in Ruby On Rails, a technology used by

other popular websites like Twitter, and has a MySQL database that stores all data needed to carry out the experiment and the subsequent analysis. MySQL is a freely available open-source relational database management system based on Structured Query Language, the most popular language for adding, accessing, and managing content in a database.

The application was designed to be used by three different user profiles. First, we have the players who were shown a detailed tutorial at the beginning (see below) for a better understanding of the interface and basis of the experiment. Second, there are teachers who were responsible for supervising students through their dedicated web monitors, facilitating the work of the central administrator, and contributing to the success of the experiment. Third, the administrators were responsible for controlling the game and everything that was happening in real time. The application, which was designed using technologies compatible with all platforms, was managed from a standard web browser. There was a last participant, a demon or process running in the background with the function to update the results and play instead of players who do not play within the specified time frame for each action.

Considering that the experiment required that around 1,300 students play online simultaneously, we used a server with enough power, and many optimizations were performed in terms of connections to the server, access to database, client-server data exchange, lightness of the interface, control logic, etc. The experiment started on December 20, 2011 at 10:00 CET. These steps were followed during the development of the experiment:

- i) Administrators opened the registration process.
- ii) Players (students) gradually registered.
- iii) After all students had registered, teachers informed the administrators through their screen.
- iv) As soon as the required number of participants had registered (this time took around 20 min), administrators blocked additional registrations and initiated the reading of the tutorial.
- v) Students and teachers read the tutorial.
- vi) Teachers informed (also through their screens) administrators that the reading was completed.
- vii) The experiment treatment began, which lasted 51 rounds.
- viii) Students played according to some predefined times (a maximum of 20 s per round to choose an action). During these steps, teachers controlled for any potential problem using a chat channel that connected them to the administrators. As mentioned above, if one student did not play within the 20 s given for each action, the demon played automatically (see below). The administrators were able to identify those students who was not playing and contact the teachers if the situation persisted. However, the experiment went smoothly, and no feedback to the professors for misbehavior was needed.
- ix) The experiment treatment finished, and a brief tutorial on the second experiment (control) was shown.
- x) After teachers and students had read the tutorial, the former notified the administrators.
- xi) Administrators started the control treatment, which lasted 59 rounds.
- xii) Students played as in the previous treatment.
- xiii) After the control treatment finished, volunteers were presented a short questionnaire to fill in.

xiv) All participants checked their earnings and were given their show-up fee.

**1.3 Online Tutorial for Players.** The following information is a translation of the Spanish original online tutorial (available on request). It is worth remarking that each player had a customized pair of colors and a corresponding number of neighbors. We refer to the latter as X (but X showed its actual value for each participant). As advanced above, to avoid framing effects, the two actions were always referred to in terms of colors (chosen randomly among a predefined set of possible pairs of colors), and the game was never referred to as Prisoner's Dilemma in the material handed to the volunteers. This information notwithstanding, subjects were properly informed of the consequences of choosing each action, and some examples were given to them in the introduction (see the tutorial text below). After every round, subjects were given the information of the actions taken by their neighbors and their corresponding payoffs. In all cases, the payoffs were properly normalized to avoid the possibility of guessing the number of connections of their neighbors. The instructions given here assume a given pair of colors (green and brown), but again, each participant saw the actual color assigned to him/her. Moreover, we took into consideration the possibility that some of the students were colorblind. In this sense, we provided clear instructions to avoid any possible error in the final results, specifying the order in which each color appeared on the screen and also using a combination of specifically selected colors (five different pairs); therefore, the probability of error was reduced to a minimum.

**Page 1: This is an experiment designed to study how individuals make decisions.**

You are not expected to behave in any particular way. Whatever you do will determine the amount of money you can earn. You have a written version of this direction, which you can check at any stage of the experiment. Please keep quiet during the experiment. If you need help, raise your hand and wait to be attended.

**Page 2: Directions to participate in the experiment.**

This experiment consists of TWO (2) parts. Each part consists of an undetermined number of ROUNDS (approximately between 50 and 70, but there might be more or less). Each part will last at most 35 min, but could finish before. In each part you will be able to earn different amounts of money, depending on the decisions that you and the rest of participants make in every round. The earning of each round is given in a monetary unit called ECU. When the experiment finishes, an exchange rate from ECUs to Euros will be established as a function of the number of participants. Your total earning in this experiment will be the accumulated earnings in all of the rounds of the two parts, plus a show-up fee.

**Page 3: A round.**

In each ROUND you will be placed in a node of a virtual NETWORK. In this network you will be linked to X (here, the actual number is shown to each participant) people, whom we shall refer to as "neighbors." Your neighbors will also be connected to other people. You will be one of those neighbors, but the rest of them will not necessarily be the same neighbors that you have.

You will never know who your neighbors are, and nobody will know if you are his/her neighbor either. The network is virtual. People around you in the room are not necessarily your neighbors.

**Page 4: Decision to make in every round.** Every round, each of the participants must choose a color: GREEN or BROWN. (As explained before, each participant sees the actual colors chosen for them. For clarity, we, henceforth, refer to green and brown,)

To choose a color you just have to click a button appearing in the screen.

Each time you choose a color (either blue or yellow) you will earn an amount of money which will depend on your and your X neighbors' choices.

If you choose GREEN and your neighbor also chooses GREEN, each receives 7 ECUs. If you choose GREEN and your neighbor chooses BROWN, you receive 0 ECUs and your neighbor 10 ECUs.

If you choose BROWN and your neighbor also chooses BROWN, each receives 0 ECUs.

If you choose BROWN and your neighbor chooses GREEN, you receive 10 ECUs and your neighbor 0 ECUs.

These rules are the same for all participants.

**Page 5: Possible payoffs per neighbor.**

In the following table each row corresponds to the decision you can make and each column correspond to one of your neighbors' decision.

Consider that:

you and each of your neighbors will globally earn more if you both choose GREEN (7 ECUs you/7 ECUs your neighbor); you will earn more if you choose BROWN and your neighbor chooses GREEN (10 ECUs you/0 ECUs your neighbor); but if both you and your neighbor choose BROWN you both will earn less (0 ECUs you/0 ECUs your neighbor) than if you both chose GREEN.

**Page 6: This is the screen you will be seeing during the experiment (note that each participant actually sees the graph corresponding to his/her connectivity).**

The central circle represents you, and the surrounding circles represent your virtual neighbors in that round.

On the right of the screen you will see two buttons: GREEN and BROWN.

Each round you must choose one of them clicking the corresponding button.

**Page 7: These are some examples of what you could earn in a round.**

Example 1: Imagine you choose GREEN, 3 of your neighbors choose GREEN and 1 chooses BROWN. In that round you will earn  $3 \times 7 + 1 \times 0 = 21$  ECUs.

Example 2: In another round you choose BROWN, 2 of your neighbors choose GREEN and 2 choose BROWN. In that round you will earn  $2 \times 10 + 2 \times 0 = 20$  ECUs.

**Page 8: Round iteration.**

Remember that each part will consist of an undetermined number of rounds.

Each round you will have up to 20 s to choose a color. After these 20 s, if you didn't choose, the system will choose for you. Whatever happens it will not affect the behavior of the system in the next rounds: you will be able to make your subsequent choices normally. (Don't worry: 20 s are more than enough to make a choice).

The round will not end until all participants have made their choice.

At the end of each round you will see a screen like this one. The central circle represents your choice (as given by the color) and your earning in this round. The surrounding circles represent your X neighbors' choices (represented by their colors) and their respective earnings in that round.

Your neighbors' earnings are given with respect to your number of neighbors. For example, you have 5 neighbors and one is Ferdinand (fictitious name). Ferdinand in turn has two neighbors: one is you and the other a stranger. If Ferdinand has won 10 ECUs in the last round, the gain of Ferdinand that you are shown is:  $(10 \text{ ECUs}/2 \text{ neighbors of Ferdinand}) \times 5 \text{ neighbors of you} = 25 \text{ ECUs}$ .

Note that what each of your neighbors has won depends on what you have chosen and also on what the neighbors of your neighbors have chosen.

Immediately after finishing a round there will be a new one, and then another one, and so on until you see a screen warning you about the end of that part of the experiment.

**Page 9: Part I of the experiment.**

In this part the system will randomly assign each participant to a given node of the virtual network.

**This place will be kept fixed until this part ends.**

This means that you will be interacting with **the same X neighbors** during all rounds of this part. Remember that in each round you must choose a color.

When this part finishes, you will be notified and will see the directions for the next part.

(Part I begins.)

**Page 10: Part I of the experiment has finished.**

Please keep quiet.

Part II will start in a few seconds.

**Page 11: Part II of the experiment.**

In this part, **before each round begins**, every participant will be moved to a **new** random node of the virtual network. Therefore, in general **you will likely have X new neighbors every round**.

This means **that the node you are in will be changing along the experiment**.

Thus, you will NOT be linked all rounds to the same X neighbors.

**Page 12: The rules to make decisions every round are the same as in part I.**

The only thing that is different is that your neighbors will most likely not be the same every round.

Remember:

Every round you have 20 s to make a choice.

The round finishes only when all participants have made their decisions.

At the end of each round you will be seeing a screen like in part I.

(Part II begins.)

**Page 13: Part II of the experiment has finished.**

Please, keep quiet.

The experiment has not finished yet.

You have to answer the following questionnaire.

Please, answer ALL questions in the questionnaire that you will be shown immediately.

(The questionnaire was shown and afterward they were notified how much they had earned and were to go to get paid.)

**1.4 Synchronous Play and Automatic Actions.** The experiment assumes synchronous play; thus, we had to make sure that every round ended in a certain amount of time. This playing time was set to 20 s, which was checked during the testing phase of the programs to be enough to make a decision, while at the same time, not too long to make the experiment boring to fast players. If a player did not choose an action within 20 s, the computer made the decision instead. This automatic decision was randomly chosen to be the player's previous action 90% of the times and the opposite action 10% of the times. We chose this protocol using previous testing performed in a similar experiment (1). Volunteers were informed that the computer would play for them if their decision took more than the prescribed timeout. However, they were not informed of the precise strategy used by the computer to avoid any bias in their own choices of strategy. In any case, for the reliability of the experiment, it is important that a huge majority of actions were actually played by humans and not by the computer. This quantity, when averaged over all rounds, yields that 90% of the actions were chosen by humans, regardless of the underlying network of contacts.

**1.5 Questionnaires.** At the end of the experiments, volunteers were presented a small questionnaire to fill in. The list of questions (translated into English) was as follows:

- i) Describe briefly how you made your decisions in part I (experiment).
- ii) Describe briefly how you made your decisions in part II (control).
- iii) Did you take into account your neighbors' actions?
- iv) Is something in the experiment familiar to you (yes/no)?
- v) If so, please point out of what it reminds you.
- vi) If you want to make any comment, please do so below.

The first three questions have a clear motivation, namely to see whether (possibly some) players did have a strategy to decide on their actions. Question 3 was intended to check whether players decided on their own or did look at their environment, because only in this last case do imitative or conditionally cooperative strategies make any sense. Questions 4 and 5 focused on the possibility that some of the players recognized the game as a Prisoner's Dilemma, because they had a prior knowledge of the basics of game theory. The final question just allowed them to enter any additional comment that they would like to make. We did not carry out a more detailed questionnaire to avoid the risk of many players' leaving it blank (the whole experiment was already very long).

## SI Results and Discussion

Here, we present additional results aimed at supporting the findings shown in the text. As there, we will refer to the basic types of individuals found in the experiment as mostly cooperators (C; players who cooperate with a high probability regardless of the context), mostly defectors (D; players who defect with a high probability regardless of the context), and moody conditional cooperators (players whose action depends on their previous action as well as the level of cooperation in their neighborhood) (Fig. 3 A and B).

Fig. S4 shows the histograms of the number of players ranked according to the fraction of cooperative actions that they performed along the control phase in the lattice (Fig. S4, Left) and the heterogeneous network (Fig. S4, Right). The same results for the experimental phase can be found in Fig. 2 C and D. The comparison between the plots shows a large increase in the fraction of individuals that never or almost never cooperated in the control with respect to the experiment. This finding is likely to be a consequence of the fact that, in the experiment, there is an initial amount of cooperation well above 50%, which is not

the case in the control. At the other extreme of the plots, the (small) amount of highly cooperative players remains approximately the same, indicating that their motivation has nothing to do with having or not having a fixed environment for their interactions. The general picture thus arising from the control part is that there is not much cooperation, and the majority of players do not cooperate other than occasionally.

However, Fig. S5 displays the time evolution of the distribution of cooperative actions in the experimental part. The histograms show the players' frequency as a function of the fraction of cooperative actions along successive 10-round periods corresponding to the experimental phase in the lattice (Fig. S5, *Left*) and the heterogeneous network (Fig. S5, *Right*). The results show evidence of some degree of learning as the experiment progresses. Indeed, the number of people who cooperate never or rarely increases with time. This finding would be consistent with the decay of cooperation shown in Fig. 24; although the first quick drop in cooperation would be explicable within a computer model with a fixed proportion of D, C, and moody conditional cooperators, the second part of the evolution, a much slower decay, is inconsistent with such a model and must then come from changes in the proportion of the different types of players.

The phenomenon that we have just described can also be shown in a different manner, namely by monitoring the evolution of mostly defectors during both the experimental and control parts of the experiment. Fig. S6 represents the fraction of agents with probability to cooperate that is below a given threshold (indicated

on the right) at every round (time  $t$ ). To calculate this quantity, we have taken into account the actions of the players during the previous 10 rounds. The results obtained show an increasing trend (more evident for the experimental phase) (Fig. S6, *Upper*) for both the square lattice and the heterogeneous network, which confirms the tendency of the players to learn that they should defect as time goes on.

We also report on the statistical analysis that we carried out about the experimental data. To determine whether the likelihood to cooperate differs significantly in the two studied networks, we use the Kolmogorov–Smirnov test for the two datasets. We take, as a first sample, the distribution of the probability to cooperate in the lattice cumulated over all rounds of the experimental phase. The second sample used as input for the Kolmogorov–Smirnov test corresponds to the same distribution but for the heterogeneous network. These distributions are represented in Fig. 2. The maximum difference between the cumulative distributions for the experimental phase is 0.1071, with a corresponding value for  $P_{KS} = 0.995$ . The statistics of both samples, together with the ones corresponding to the control phase in Fig. S4, are summarized in Table S1.

Finally, Table S2 summarizes the statistical fits (obtained from a weighted least squares regression) of the conditional probability  $P$  to cooperate conditioned on the player's action in the previous round ( $X =$  after C or after D) and the density  $\rho$  of cooperators in the players' neighborhoods during the previous round. Fits are defined by  $P(C|X, \rho) = a + b\rho$ . The data fitted correspond to the results shown in Fig. 3 *A* and *B*.

1. Grujić J, Fosco C, Araujo L, Cuesta JA, Sánchez A (2010) Social experiments in the mesoscale: Humans playing a spatial prisoner's dilemma. *PLoS One* 5:e13749.

**GANANCIAS POSIBLES POR CADA VECINO:**

En la siguiente tabla, cada fila corresponde a la elección que podría hacer usted y cada columna, a la elección que podría hacer uno de sus vecinos.

| SU ELECCIÓN  | ELECCIÓN DE UN VECINO |              |
|--------------|-----------------------|--------------|
|              | Cooperar (C)          | Defectar (D) |
| Cooperar (C) | 7                     | 0            |
| Defectar (D) | 10                    | 0            |

Por lo tanto, usted y cada vecino suyo ganan en conjunto más si ambos eligen ■ (7 ECUs usted / 7 ECUs su vecino); usted gana más si elige ■ y su vecino elige ■ (10 ECUs usted / 0 ECUs su vecino); usted no gana nada si elige ■ y su vecino elige ■ (0 ECUs usted/10 ECUs su vecino); pero si usted y su vecino eligen ■ ganan menos (0 ECUs usted / 0 ECUs su vecino) que si ambos hubieran elegido ■.

**ANTERIOR** **SIGUIENTE**

Fig. S1. Snapshot of the experimental software.

Esta será la pantalla que verá durante el experimento:

**Ganado en Ronda Anterior**

**Ronda**

Para jugar esta ronda seleccione un color

El círculo central es usted y los círculos a su alrededor, sus 15 vecinos virtuales en esa ronda.

En la derecha de la pantalla aparecen dos botones, el ■ y el ■.

En cada ronda debe elegir color pinchando el botón que desee.

**ANTERIOR** **SIGUIENTE**

**Fig. S2.** Snapshot of the experimental software. Note that the payoffs shown do not correspond to any real situation but simply illustrate how they were seen by the subjects.

## REPETICIÓN DE RONDAS

Recuerde que en cada parte habrá un número indeterminado de rondas.

En cada ronda usted tiene hasta 20 segundos para elegir color. Pasados los 20 segundos, el sistema elegirá por usted, aunque después usted podrá seguir eligiendo sin problemas en las rondas siguientes. (No se preocupe, 20 segundos deberían sobrarle para elegir).

La ronda no termina hasta que hayan elegido todos los participantes.

Al finalizar la ronda aparecerá una pantalla como esta:

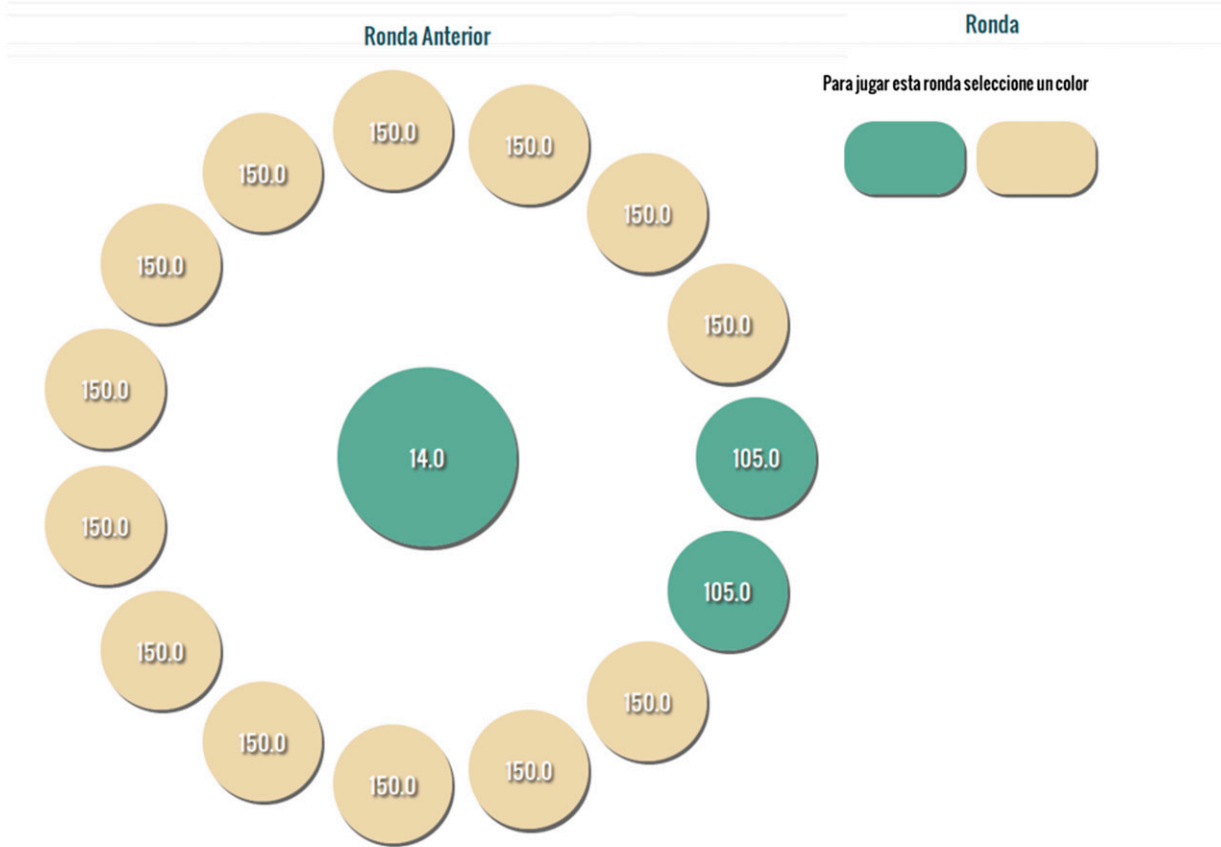

En el círculo central está usted, con el color, la ganancia que ha obtenido en esta ronda y la ganancia total. En los círculos a su alrededor, aparecen sus 15 vecinos en esa ronda, con el color que cada uno ha elegido y la cantidad que ha ganado por vecino por el número de vecinos que usted tiene.

Por ejemplo, usted tiene 15 vecinos y uno de sus vecinos es Ferdinand (nombre ficticio), y Ferdinand tiene a su vez a dos vecinos: uno es usted y otro un desconocido. Si Ferdinand ha ganado 10 ECUs en la última ronda, la ganancia de Ferdinand que a usted se le muestra es

$(10 \text{ ECUS} / 2 \text{ VECINOS DE FERDINAND}) * 15 \text{ VECINOS SUYOS} = 75 \text{ ECUs}$

Note que lo que cada vecino suyo ha ganado depende de lo que usted ha elegido y de lo que han elegido los restantes vecinos de su vecino.

Inmediatamente después de terminar una ronda, habrá otra ronda, y después de ésta, otra más y así sucesivamente hasta que reciba el aviso por pantalla que la parte del experimento ha terminado.

ANTERIOR

SIGUIENTE

Fig. S3. Snapshot of the experimental software.

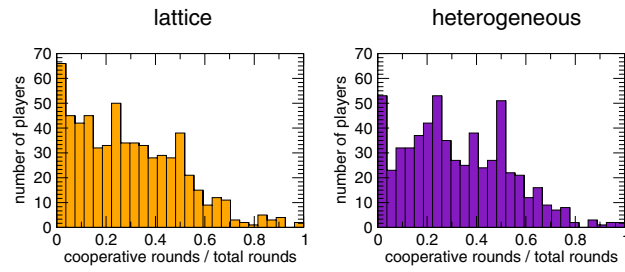

**Fig. S4.** Distribution of cooperative actions in the control. We represent the number of players that cooperated during the given number of rounds (normalized by the total number of rounds played). The results correspond to the control phase. Similar results were presented in Fig. 2.

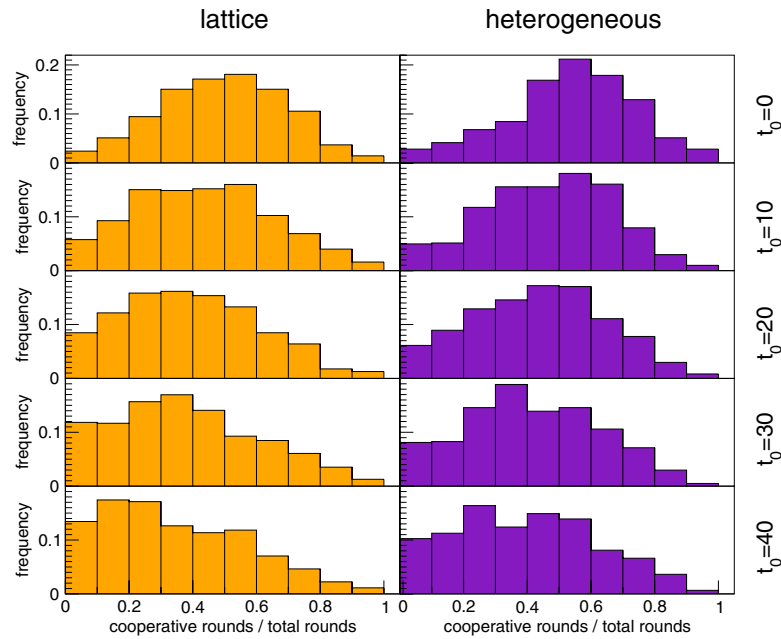

**Fig. S5.** Time evolution of the distribution of cooperative actions. The different panels show how frequently players cooperated in different time periods. The results correspond to the first treatment (experiment). Rows represent periods 1–10 ( $t_0 = 0$ ), 11–20 ( $t_0 = 10$ ), 21–30 ( $t_0 = 20$ ), 31–40 ( $t_0 = 30$ ), and 41–50 ( $t_0 = 40$ ) as indicated.

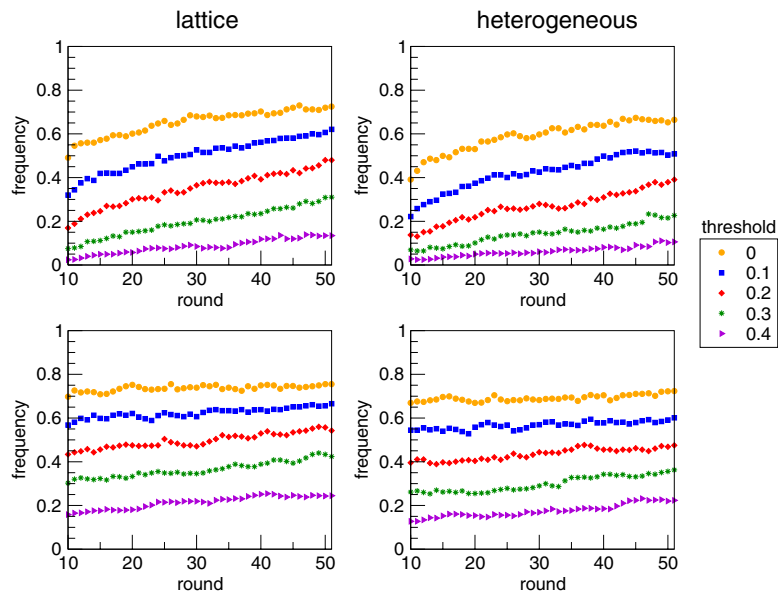

**Fig. S6.** Evolution of the fraction of mostly defectors. Fraction of agents with a cooperation probability lower than a given threshold as a function of  $t$  (=round) according to their cooperative actions through the previous 10 rounds for different values of the  $threshold = 0, 0.1, 0.2, 0.3, 0.4$ . Results for the (Left) lattice and (Right) heterogeneous network. Two treatments: (Upper) experiment and (Lower) control.

**Table S1.** Statistics of the distribution of the probability to cooperate cumulated over all rounds of the experimental and control phases in both networks (additional details in the text)

|                           | Experiment        |                   | Control           |                   |
|---------------------------|-------------------|-------------------|-------------------|-------------------|
|                           | Lattice           | Heterogeneous     | Lattice           | Heterogeneous     |
| Mean                      | 0.03703           | 0.03703           | 0.03226           | 0.03226           |
| 95% confidence interval   | (0.02434–0.04974) | (0.02335–0.05072) | (0.02549–0.04858) | (0.02607–0.04800) |
| SD                        | 0.03210           | 0.03459           | 0.02918           | 0.02772           |
| High                      | 0.0976            | 0.104             | 0.106             | 0.0878            |
| Low                       | 0                 | 0                 | 0                 | 0                 |
| Third quartile            | 0.06560           | 0.06126           | 0.05440           | 0.05795           |
| First quartile            | 0.006400          | 0.006623          | 0.006400          | 0.01159           |
| Median                    | 0.04000           | 0.03146           | 0.0448            | 0.03808           |
| Median absolute deviation | 0.02844           | 0.02937           | 0.02495           | 0.02275           |

**Table S2.** Values of the fitting parameters for the results shown in Fig. 3 A and B

|         | Lattice           |                    | Heterogeneous     |                     |
|---------|-------------------|--------------------|-------------------|---------------------|
|         | Fig. 3A           | Fig. 3B            | Fig. 3A           | Fig. 3B             |
| After C | $0.457 \pm 0.015$ | $0.122 \pm 0.034$  | $0.475 \pm 0.016$ | $0.126 \pm 0.039$   |
| After D | $0.350 \pm 0.021$ | $-0.149 \pm 0.050$ | $0.309 \pm 0.069$ | $-0.0269 \pm 0.035$ |

Fits are defined by  $P(C|X, \rho) = a + b\rho$ , with  $X = \text{after C or after D}$ . Additional details in the text.
